# Supplementary material for: PEDOT thermoelectric composites with excellent power factors prepared by 3-phase interfacial electropolymerization and carbon nanotube chemical doping
Source: Royal Society of Chemistry journal article supplement (doi:10.1039/c9ta03153g), 2019-01-01
Supplement: c9ta03153g1.pdf [file c9ta03153g1.pdf]

## Supplementary Material

### **PEDOT Thermoelectric Composites with Excellent Power Factors Prepared by 3-Phase Interfacial Electropolymerization and Carbon Nanotube Chemical Doping**

Wusheng Fan,<sup>a,b</sup> Lirong Liang,<sup>a</sup> Binbin Zhang,<sup>a</sup> Cun-Yue Guo<sup>b,\*</sup> and Guangming Chen<sup>a,\*</sup>

<sup>a</sup> College of Materials Science and Engineering, Shenzhen University, Shenzhen 518055, P. R. China

<sup>b</sup> School of Chemical Sciences, University of Chinese Academy of Sciences, Beijing 100049, P. R. China

#### **Author Information**

#### **Corresponding Authors**

\*E-mail: chengm@szu.edu.cn (G. Chen)

\*E-mail: cyguo@ucas.ac.cn (C.-Y. Guo)

#### **Contents:**

|                                                                   |   |
|-------------------------------------------------------------------|---|
| FESEM image of acid-doped SWCNT (a-SWCNT) with high magnification | 2 |
| EDS image of pristine SWCNT                                       | 2 |
| EDS image of a-SWCNT                                              | 3 |
| FTIR spectra of pristine SWCNT and a-SWCNT                        | 4 |
| FESEM image of PEDOT/a-SWCNT with high magnification              | 5 |
| References                                                        | 5 |

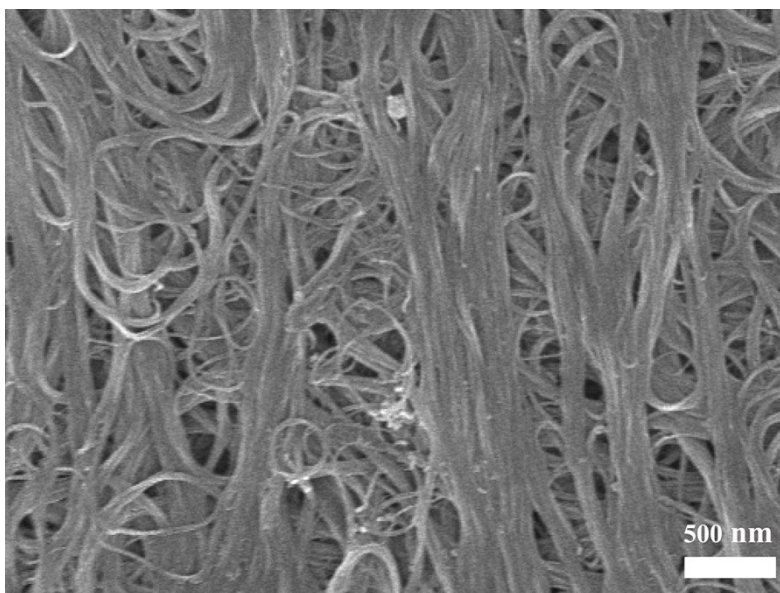

**Figure S1.** FESEM image of the neat a-SWCNT with a high magnification.

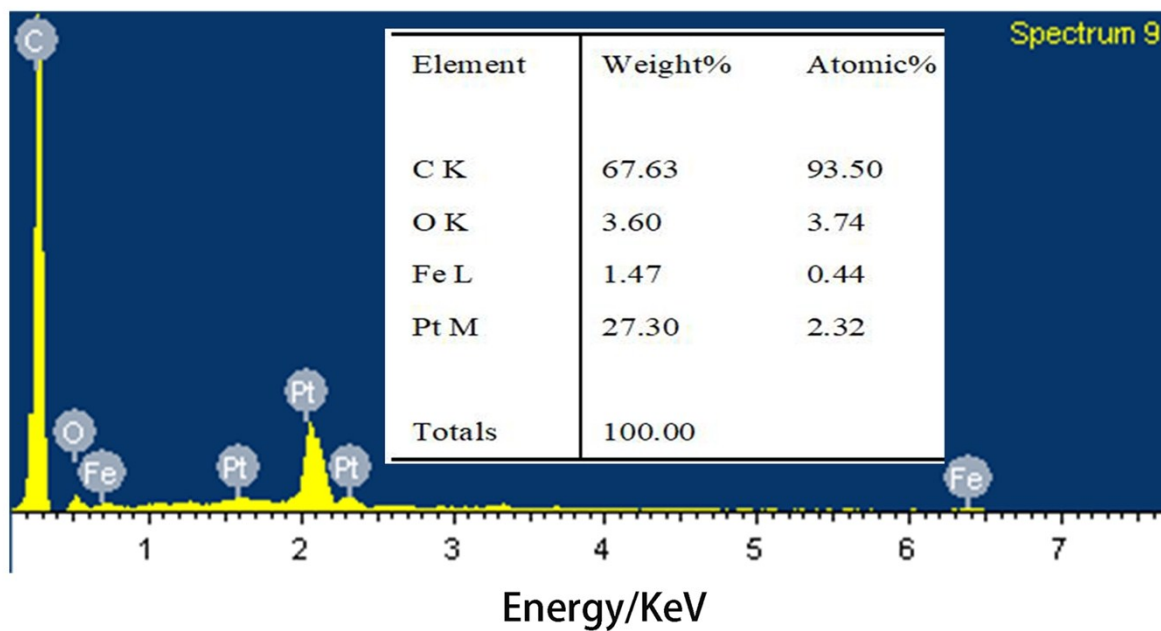

**Figure S2.** EDS image of the pristine SWCNT. The existence of Pt element is due to the covering electrically conductive layer for carrying out the measurement. The small amount of Fe may result from the residue during the preparation of the SWCNT.

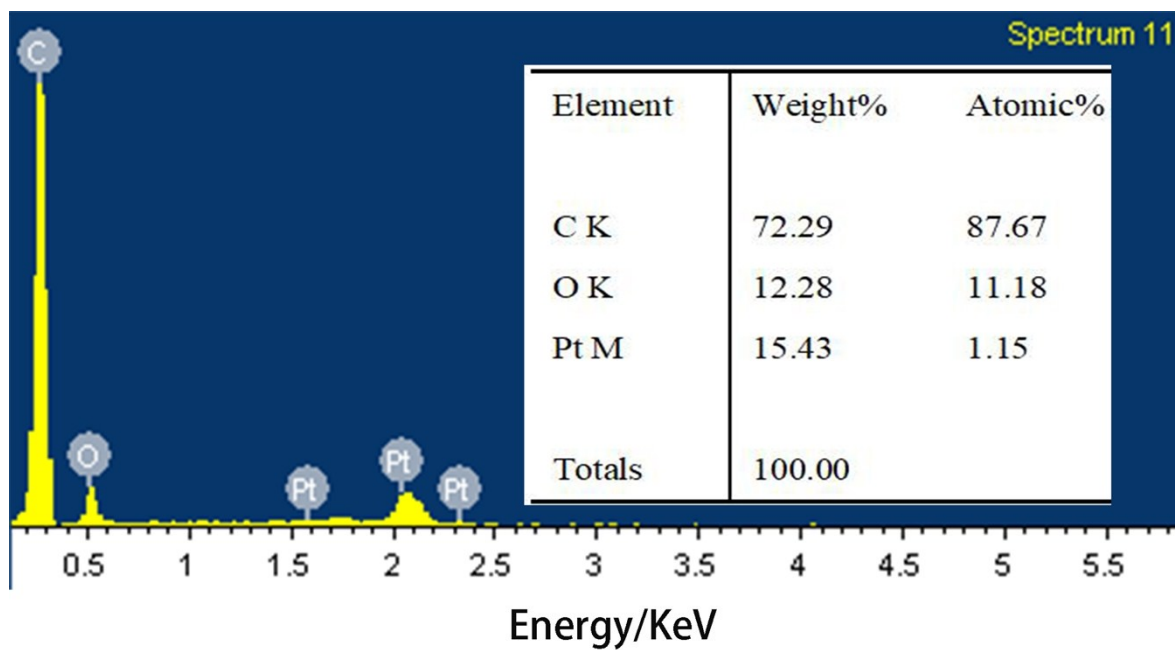

**Figure S3.** EDS image of the acid-doped SWCNT (a-SWCNT). The absence of Fe element suggests the removal after the mixed-acid treatment.

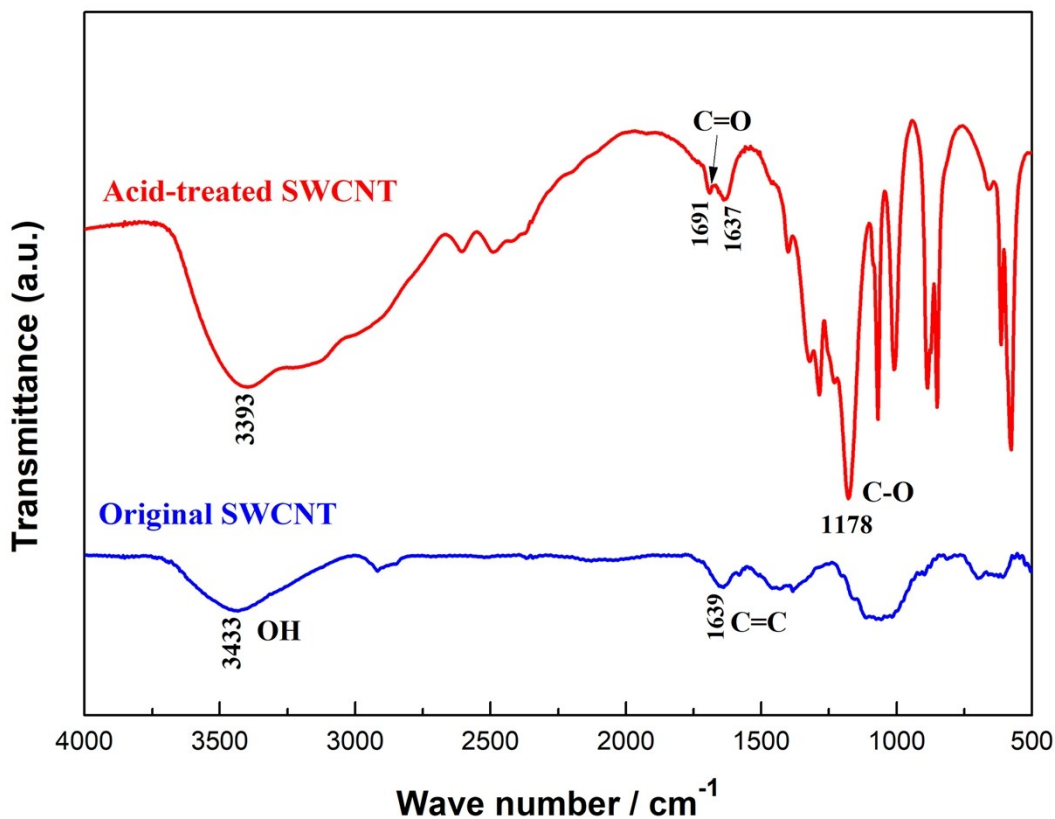

**Figure S4.** FTIR spectra of the pristine SWCNT and the a-SWCNT, confirming the success of the SWCNT surface functionalization.

For the pristine SWCNT, the band at  $1639\text{ cm}^{-1}$  is characteristic of C=C stretching vibration,<sup>[1,2]</sup> and the band at  $3433\text{ cm}^{-1}$  can be ascribed to the OH stretching vibration, resulting from oxidation during the purification of the raw material and/or ambient atmospheric moisture.<sup>[3]</sup>

For the a-SWCNT, the band of the OH stretching vibration becomes broaden. Two new bands of C=O stretching (at  $1691\text{ cm}^{-1}$ ) and C-O stretching ( $1178\text{ cm}^{-1}$ ) appear, demonstrating that rich oxygen-containing functional groups such as carbonyl, carboxyl and hydroxyl group are introduced during the acid treatment process of the SWCNT.

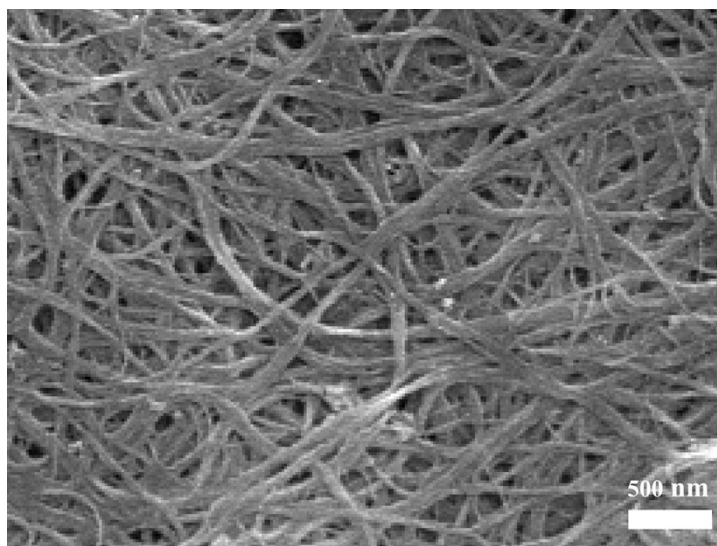

**Figure S5.** FESEM image of PEDOT/a-SWCNT composite film containing 60 wt% a-SWCNT with a high magnification.

### References:

- [1] F. Aviles, J. V. Cauich-Rodriguez, L. Moo-Tah, A. May-Pat, *Carbon*, **2009**, 47, 2970.
- [2] P. Liu, D. C. M. Hu, T. Q. Tran, D. Jewell, H. M. Duong, *Colloids. Surf. A-Physicochem. Engin. Aspects*, **2016**, 509, 384.
- [3] N. Feng, C.Gao, C.-Y. Guo, G. Chen, *ACS Appl. Mater. Interfaces*, **2018**, 10, 5603.
